# Supplementary material for: Ex vivo modelling of drug efficacy in a rare metastatic urachal carcinoma
Source: Springer Nature journal article supplement (doi:10.1186/s12885-020-07092-w), 2020-06-23

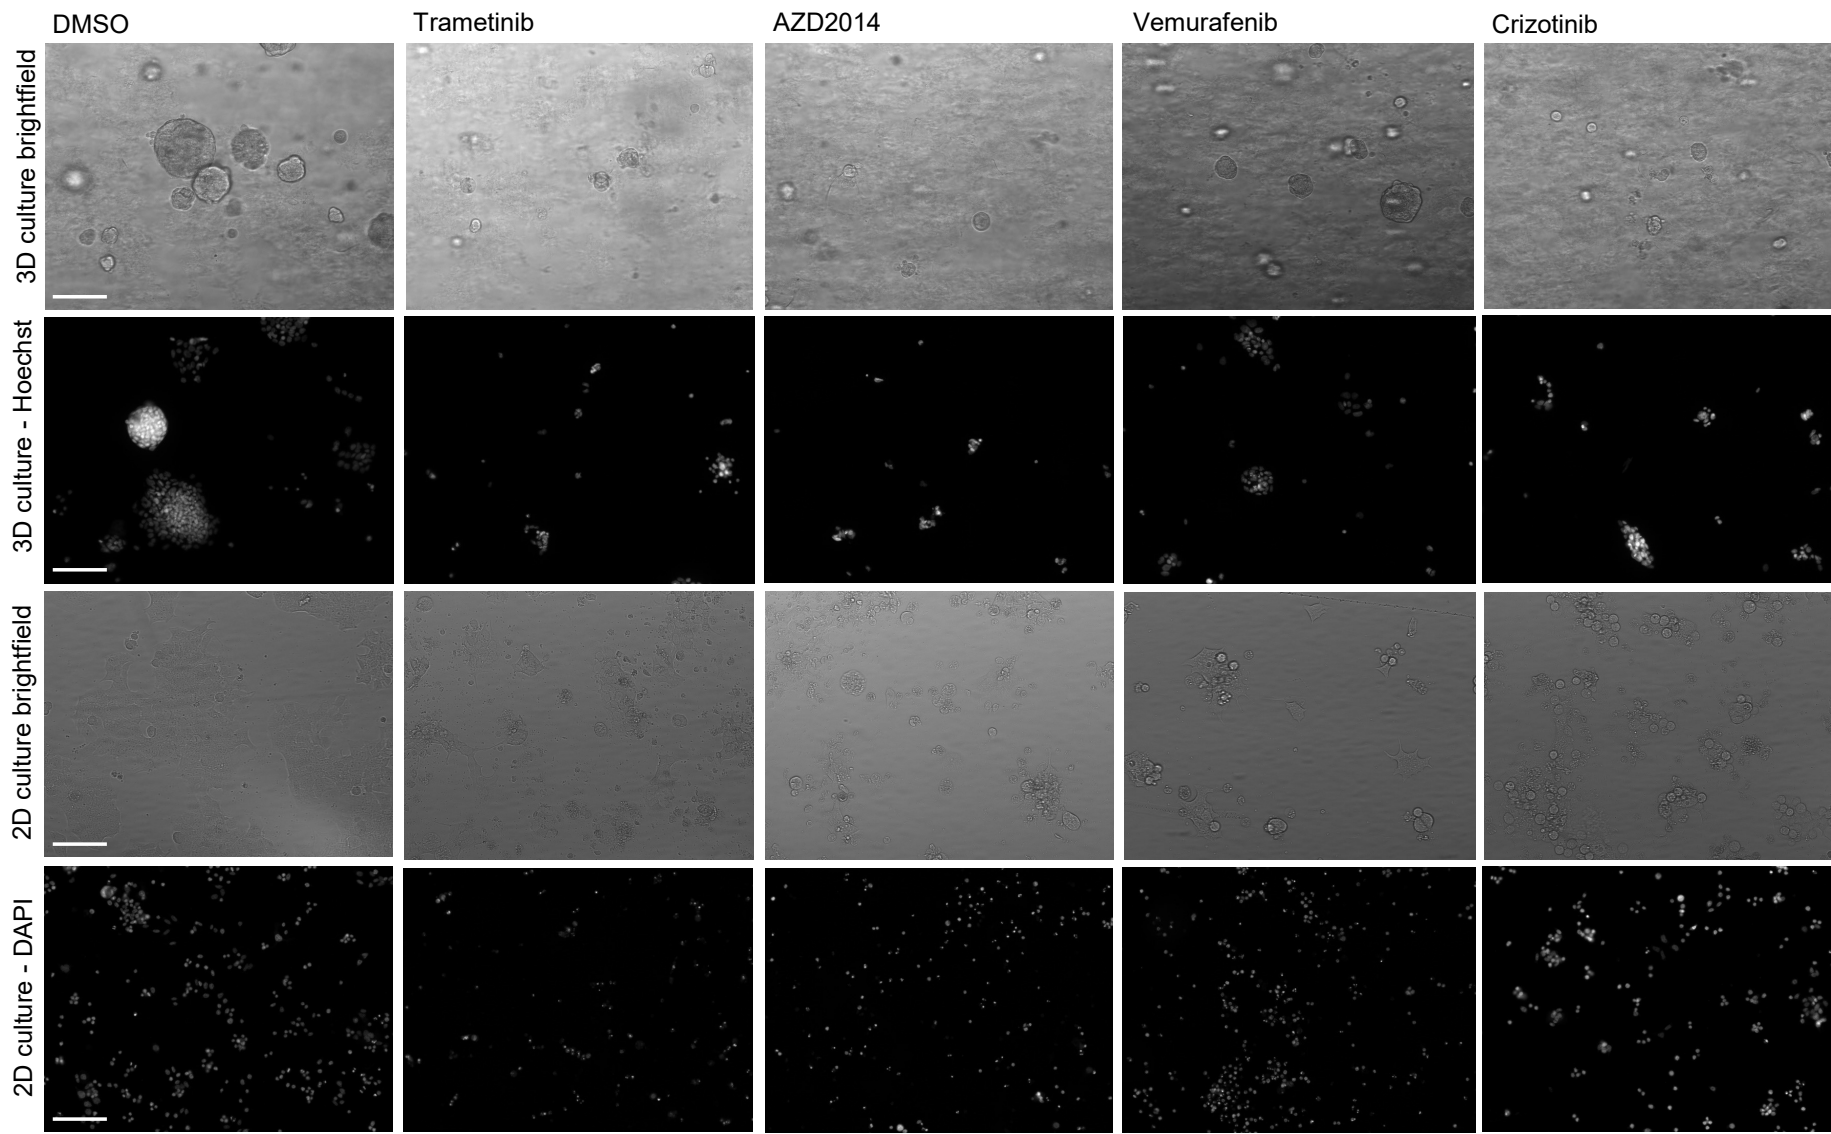

Supplement: MOESM1 [file 18112364]
